# Supplementary material for: Biochemical studies of inositol N-acetylglucosaminyltransferase involved in mycothiol biosynthesis in Corynebacterium diphtheria
Source: Royal Society of Chemistry journal article supplement (doi:10.1039/c7ob00555e), 2017-01-01
Supplement: c7ob00555e1.pdf [file c7ob00555e1.pdf]

## Supporting Information

*for*

### Biochemical Studies of Inositol *N*-Acetylglucosaminyltransferase Involved in Mycothiol Biosynthesis in *Corynebacterium diphtheria*

Yuchuan Guo,<sup>a,b</sup> Lizhen Wang,<sup>a</sup> Jiatong Guo,<sup>b</sup> Guofeng Gu,<sup>a,\*</sup> and Zhongwu Guo<sup>b,\*</sup>

<sup>a</sup>National Glycoengineering Research Center and Shandong Provincial Key Laboratory of Carbohydrate Chemistry  
and Glycobiology, Shandong University, 27 Shanda Nan Lu, Jinan 250100, China

<sup>b</sup>Department of Chemistry, University of Florida, 214 Leigh Hall, Gainesville, Florida 32611, United States

\* Corresponding author E-mails: guofenggu@sdu.edu.cn; zguo@chem.ufl.edu

#### Table of Contents

|                                                                                 |         |
|---------------------------------------------------------------------------------|---------|
| <b>Figure S1.</b> SDS-PAGE results of CdMshA-----                               | Page S2 |
| <b>Figure S2.</b> Results of kinetics studies on CdMshA-catalyzed reaction----- | Page S2 |
| <b>Figure S3.</b> Comparison of various <i>mshA</i> genes-----                  | Page S3 |
| <b>Table S1.</b> Primers used for site-directed mutagenesis of CaMshA-----      | Page S4 |
| <b>Figure S4.</b> SDS-PAGE results of various CdMshA mutants-----               | Page S4 |
| <b>Figure S5.</b> <sup>1</sup> H NMR spectrum of GlcNAc-Ins-3P-----             | Page S5 |
| <b>Figure S6.</b> <sup>31</sup> P NMR spectrum of GlcNAc-Ins-3P-----            | Page S5 |
| <b>Figure S7.</b> <sup>13</sup> C NMR spectrum of GlcNAc-Ins-3P-----            | Page S6 |
| <b>Figure S8.</b> COSY NMR spectrum of GlcNAc-Ins-3P-----                       | Page S6 |
| <b>Figure S9.</b> HSQC NMR spectrum of GlcNAc-Ins-3P-----                       | Page S7 |
| <b>Figure S10:</b> High resolution ESI-MS spectrum of GlcNAc-Ins-3-P-----       | Page S7 |
| <b>Figure S11.</b> <sup>1</sup> H NMR spectrum of (+)- <b>2</b> -----           | Page S8 |
| <b>Figure S12.</b> <sup>1</sup> H NMR spectrum of (+)- <b>1</b> -----           | Page S8 |
| <b>Figure S13.</b> <sup>1</sup> H NMR spectrum of (+)- <b>3</b> -----           | Page S9 |
| <b>Figure S14.</b> <sup>1</sup> H NMR spectrum of 1L-Ins-1-P-----               | Page S8 |

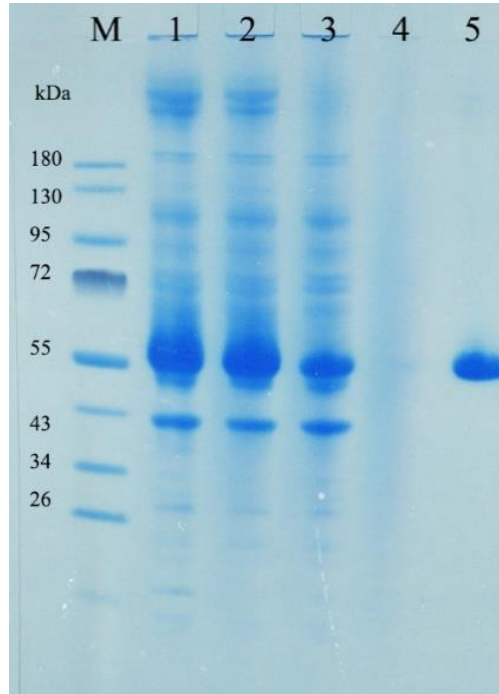

**Figure S1.** SDS-PAGE results of CdMshA purification. Lane M: molecular marker; Lane 1: whole cell lysate; Lane 2: supernatant; Lane 3: flow through fraction; Lane 4: eluent with 50 mM of imidazole; Lane 5: eluent with 100 mM of imidazole

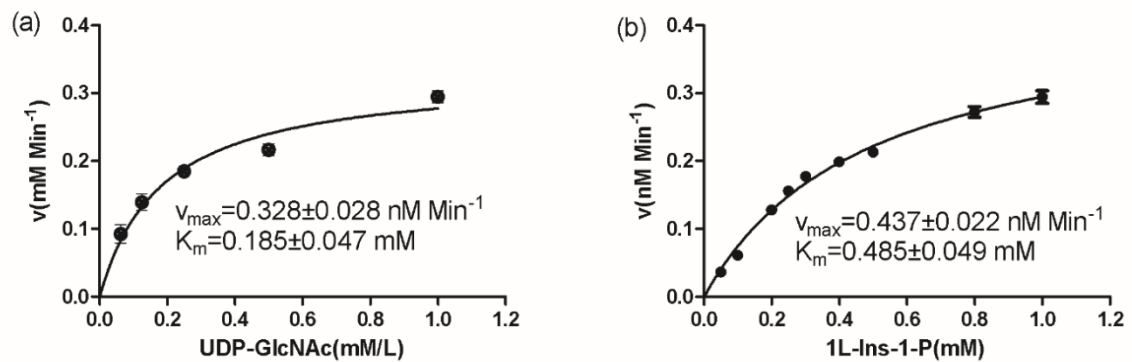

**Figure S2.** Results of kinetics studies on CdMshA-catalyzed reaction. The kinetics parameters for for UDP-GlcNAc (a) and 1L-Ins-1-P (b)

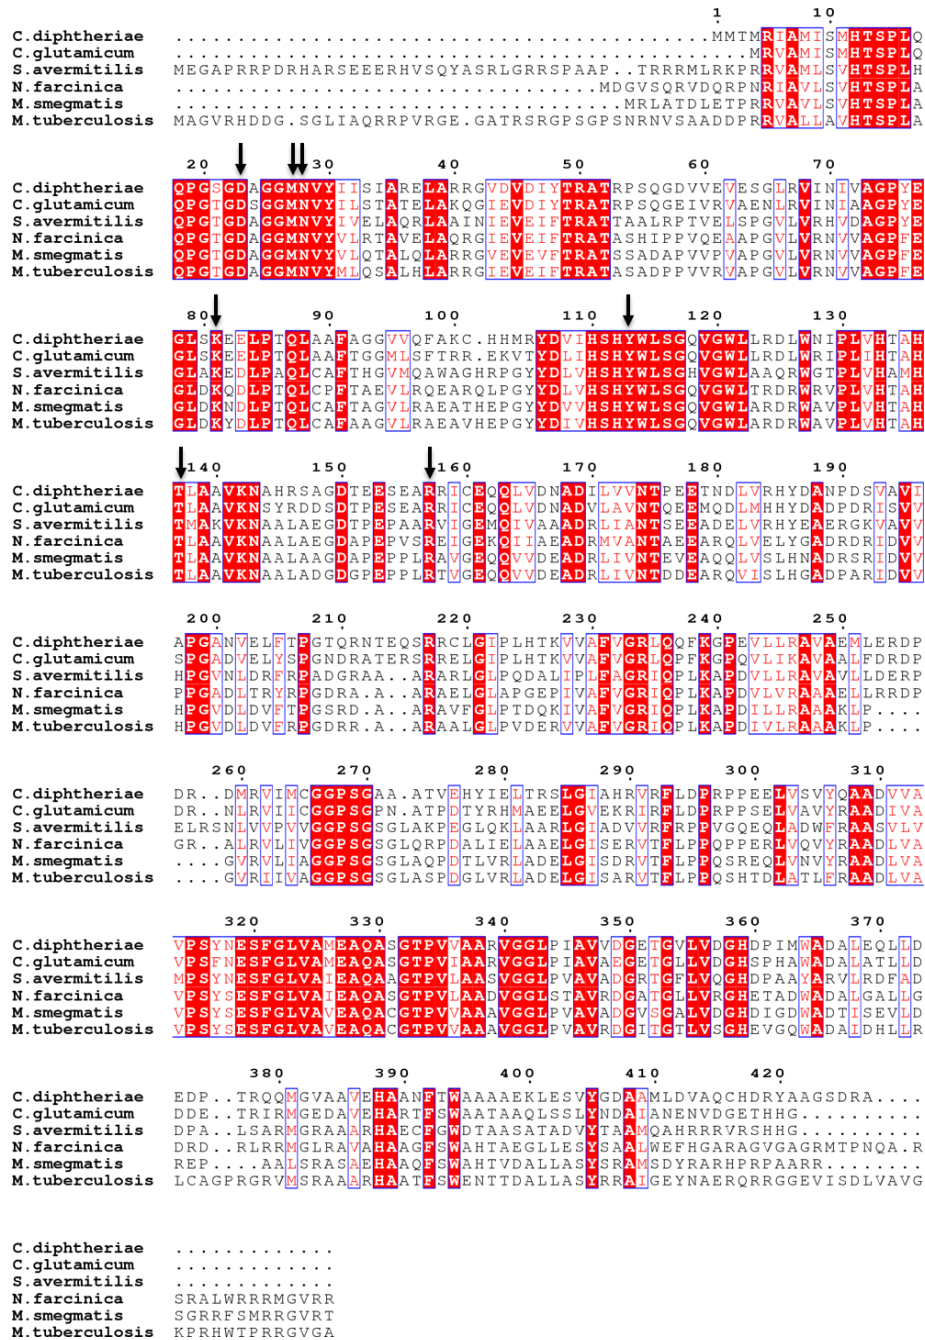

**Figure S3.** Sequence alignment of the *mshA* genes from various mycothiol-producing organisms: *C. diphtheriae* (WP\_014316335.1); *C. glutamicum* (BAB97794.1); *Streptomyces avermitilis* (WP\_010985435.1); *Nocardia farcinica* (BAD60044.1); *Mycobacterium smegmatis* (WP\_011727296.1); *M. tuberculosis* (NP\_215000.1). Red and pink boxes represent conserved and semi-conserved AA residues, respectively, among the orthologs analyzed. The sites studied by mutagenesis were indicated with arrows. Sequence alignment and comparison were conducted with Clustal Omega program (<http://www.ebi.ac.uk/Tools/msa/clustalo/>) and the figure was prepared with ESPrnt 3 (<http://esprnt.ibcp.fr/ESPrnt/cgi-bin/ESPrnt.cgi>)

**Table S2.** Primers used for site-directed mutagenesis of CaMshA

| Mutants | Primers                       |
|---------|-------------------------------|
| D23A-F  | CCAGGCAGCGGAGCCGCAGGTGGAATG   |
| D23A-R  | GGCTCCGCTGCCTGGTTGCTGCAGG     |
| M27A-F  | GACGCCGGTGGTGCGAACGTGTACATC   |
| M27A-R  | CGCACCACCGGCGTCACCGCTACCT     |
| N28A-F  | GCCGGTGGTATGGCCGTGTACATCATT   |
| N28A-R  | GGCCATAACCACCGGCGTCACCGCTA    |
| K81A-F  | GAGGGCCTGAGCGCAGAAGAAGACTGCCG |
| K81A-R  | TGCGCTCAGGCCCTCATACGGGCCT     |
| Y113A-F | ATCCATTCCCACGCCTGGCTGTCCGGC   |
| Y113A-R | GGCGTGGGAATGGATCACGTCGTA      |
| T137A-F | CACACCGCGCACGCCCTGGCGGCGGTA   |
| T137A-R | GGCGTGCGCGGTGTGTACCAGTGGG     |
| R157A-F | GAATCTGAGGCTGCTCGTATTTGTGAG   |
| R157A-R | AGCAGCCTCAGATTCTTCGGTATCG     |

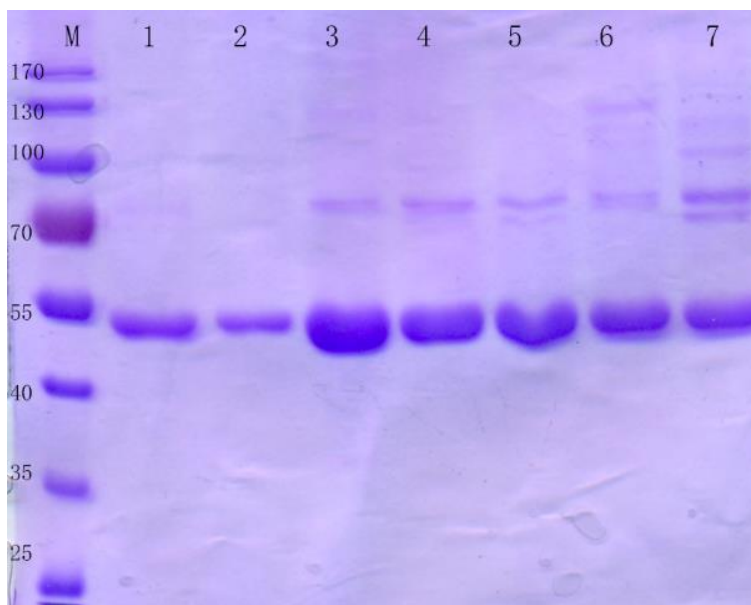

**Figure S4.** SDS-PAGE results of various CdMshA mutants. Lane M: molecular marker; Lane 1: D23A; Lane 2: M27A; Lane 3: N28A; Lane 4: K81A; Lane 5: Y113A; Lane 6: T137A; Lane 7: R157A

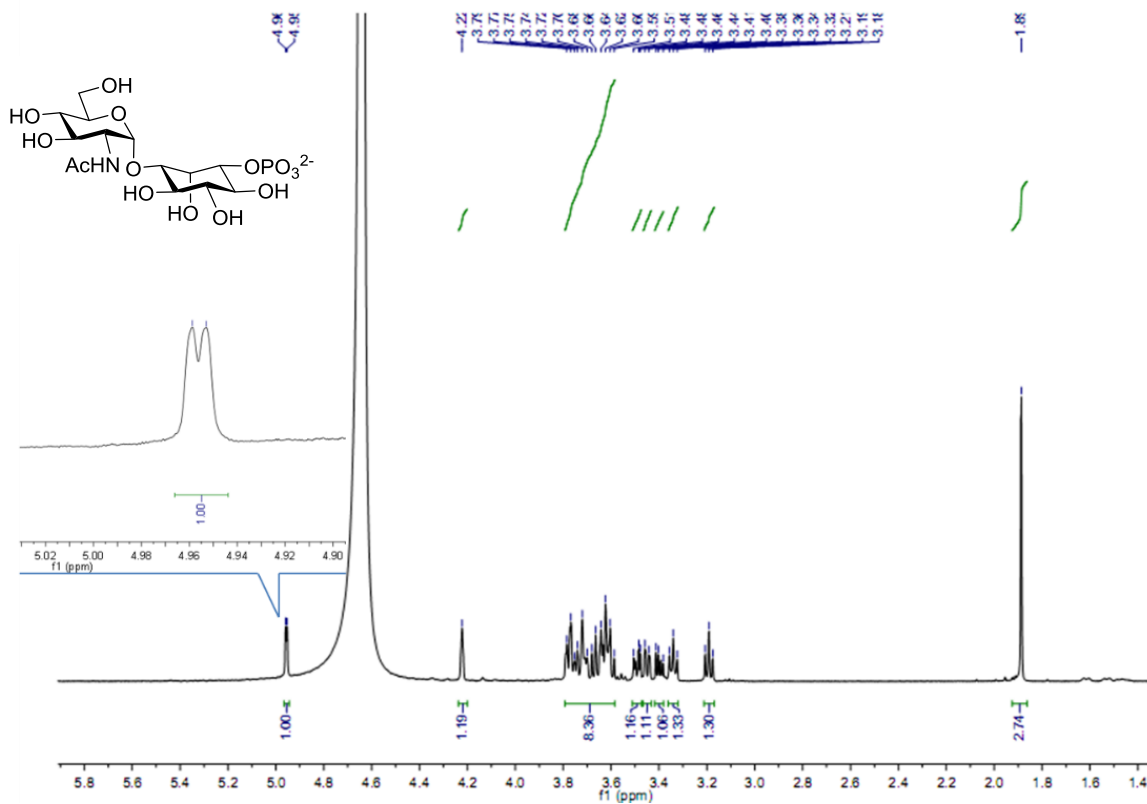

**Figure S5:** <sup>1</sup>H NMR spectrum (600 MHz, D<sub>2</sub>O, 25 °C) of GlcNAc-Ins-3-P

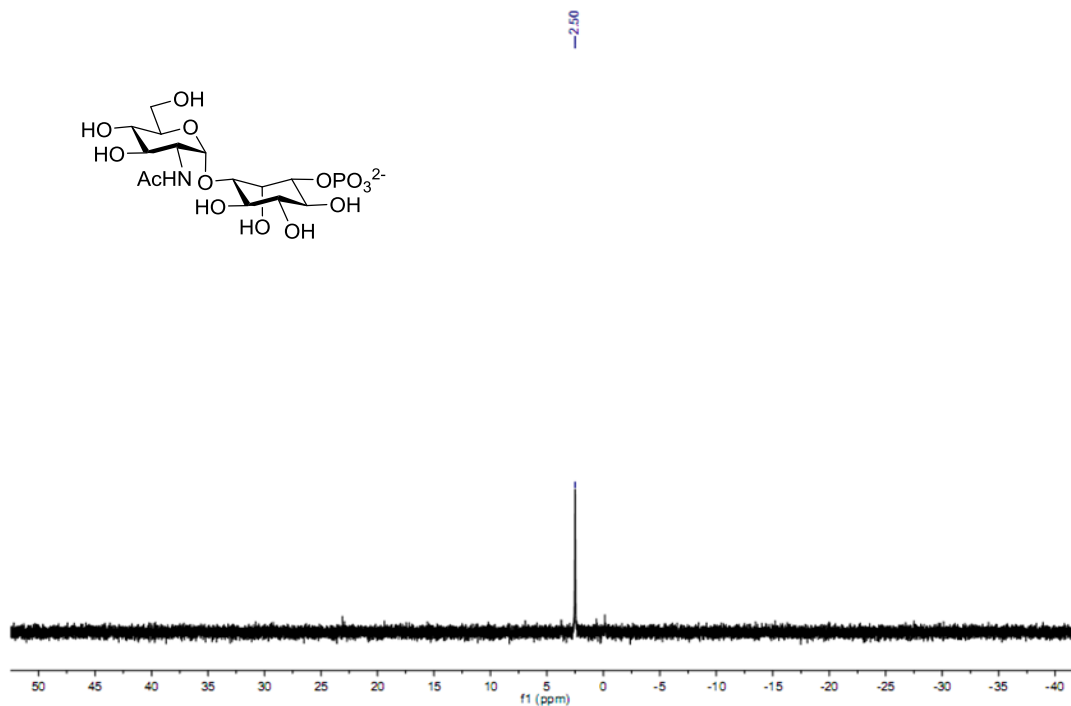

**Figure S6:**  $^{31}\text{P}$  NMR spectrum (243.9 MHz,  $\text{D}_2\text{O}$ , 25 °C) of GlcNAc-Ins-3-P

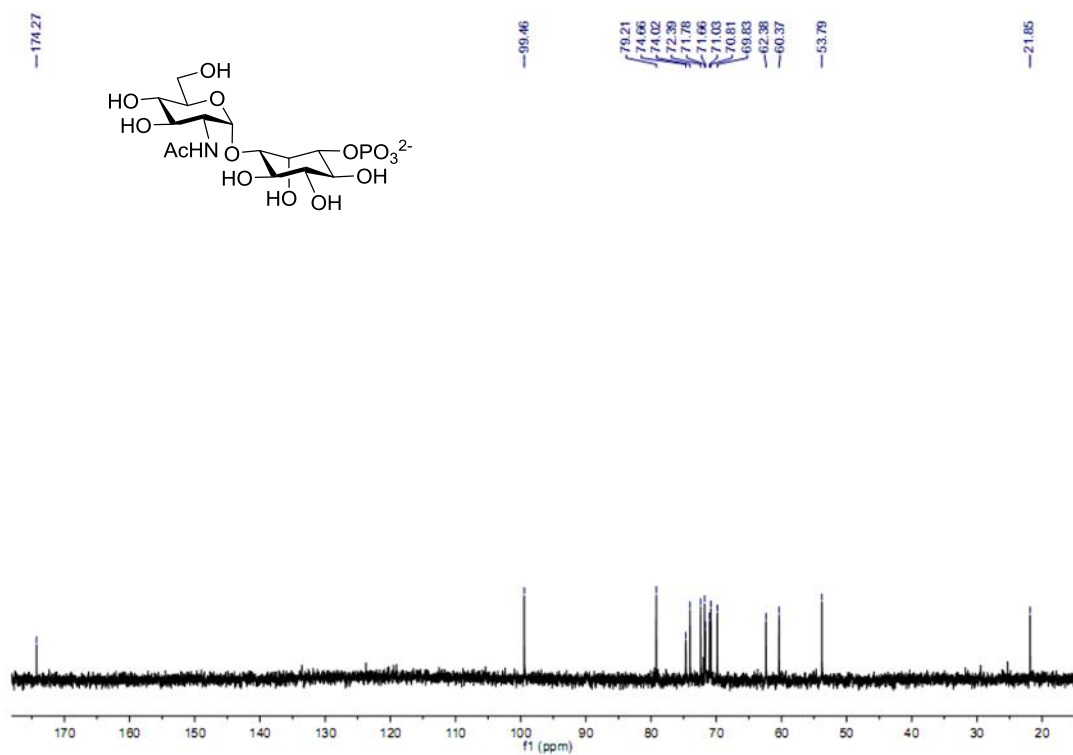

**Figure S7:**  $^{13}\text{C}$  NMR spectrum (125 MHz,  $\text{D}_2\text{O}$ , 25 °C) of GlcNAc-Ins-3-P

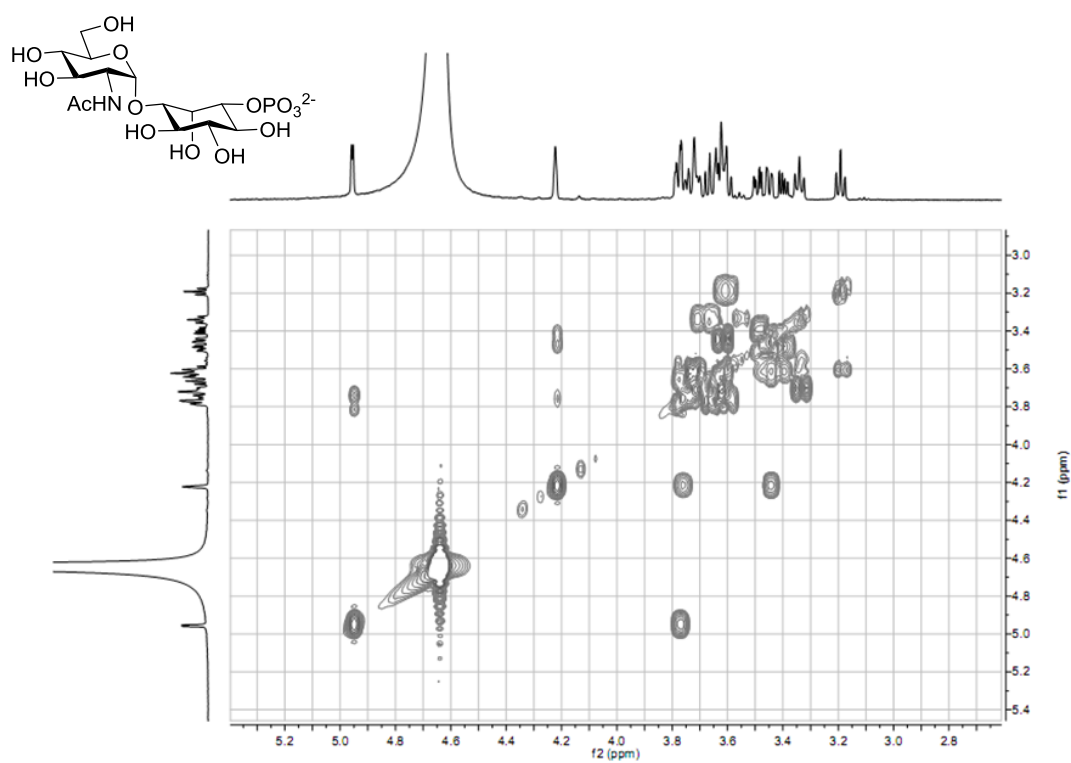

**Figure S8:**  $^1\text{H}$ - $^1\text{H}$  COSY NMR spectrum (600 MHz,  $\text{D}_2\text{O}$ , 25 °C) of GlcNAc-Ins-3-P

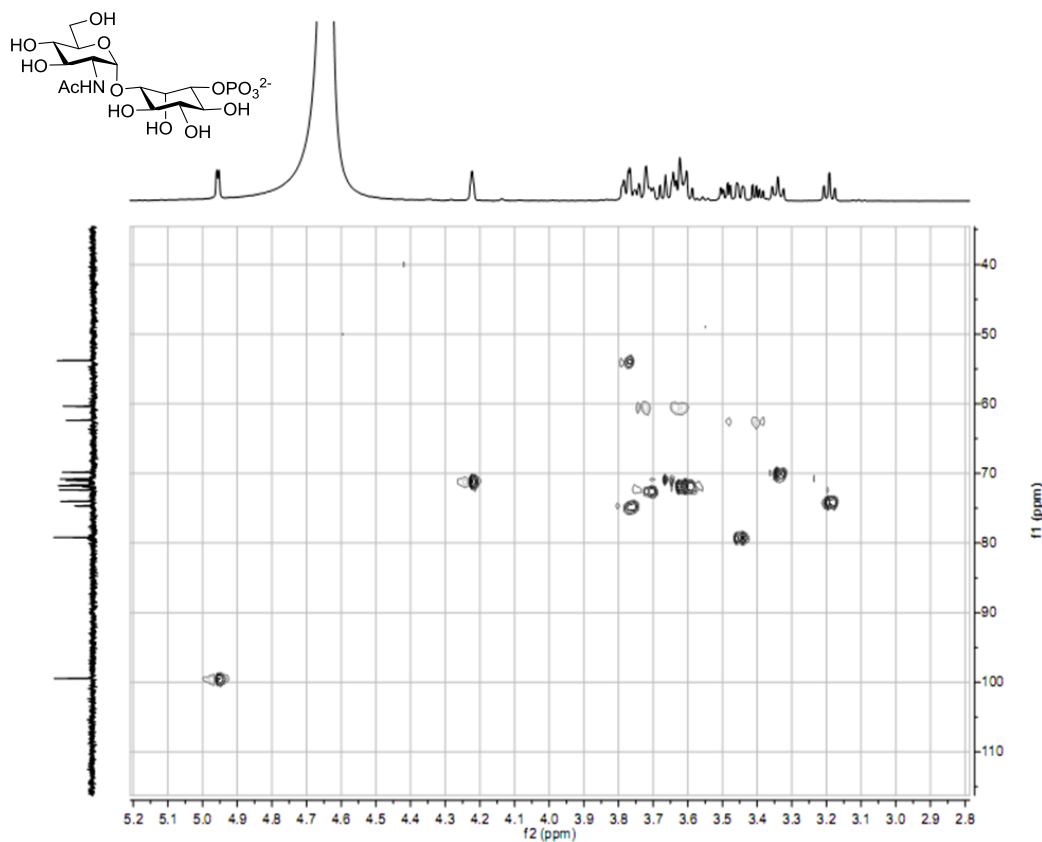

**Figure S9:**  $^1\text{H}$ - $^{13}\text{C}$  HSQC NMR spectrum (600/150 MHz,  $\text{D}_2\text{O}$ , 25 °C) of GlcNAc-Ins-3-P

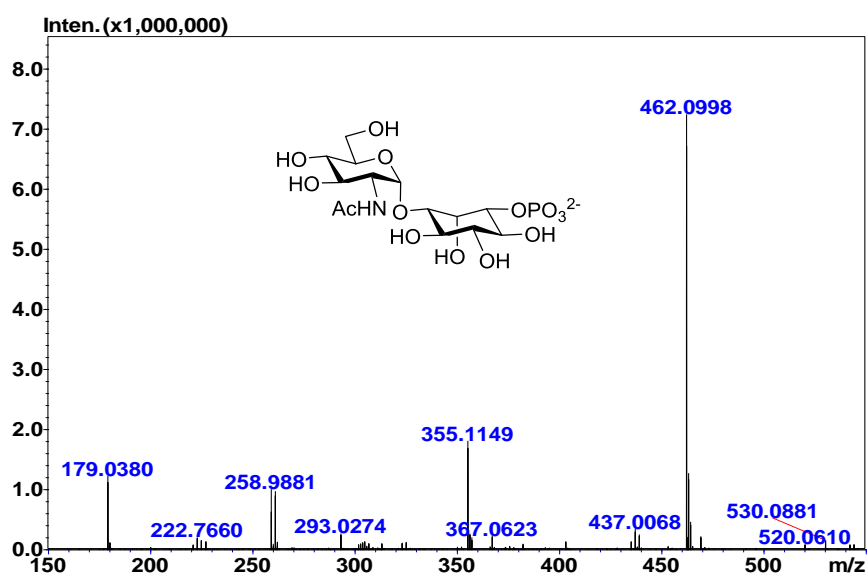

**Figure S10:** High resolution ESI-MS spectrum of GlcNAc-Ins-3-P

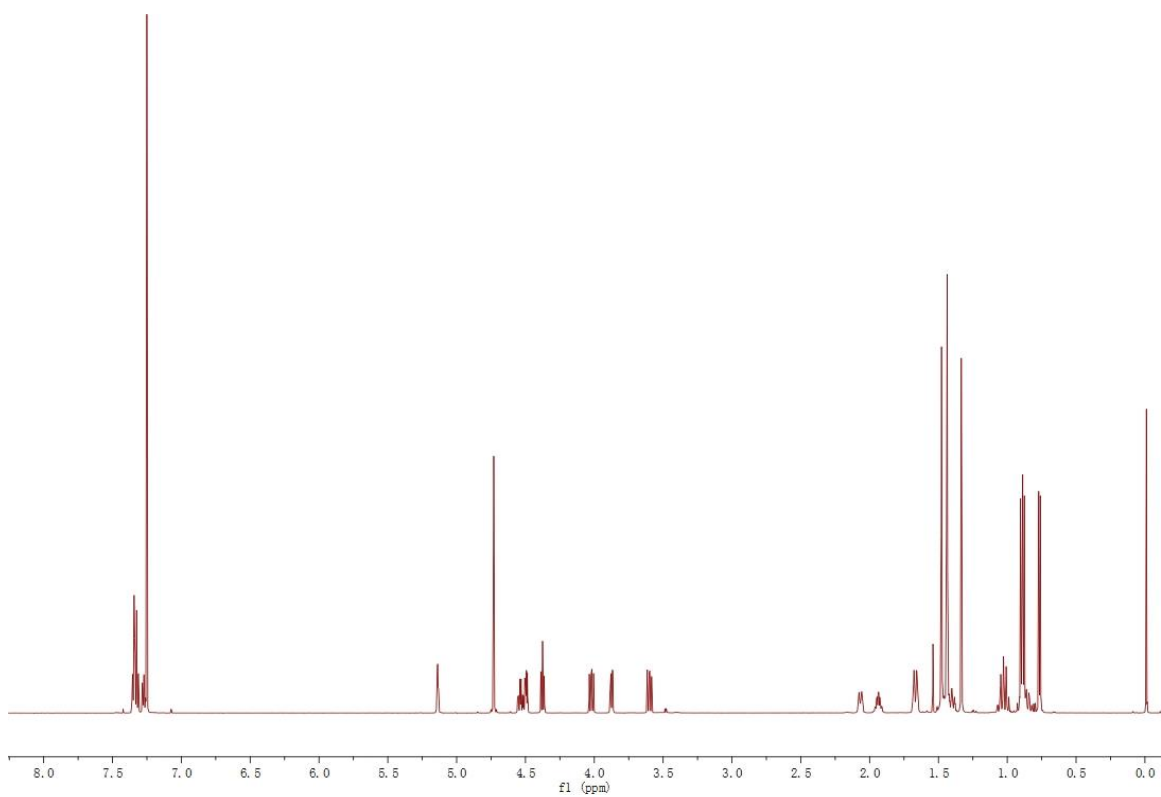

**Figure S11:** <sup>1</sup>H NMR spectrum (600 MHz, CDCl<sub>3</sub>) of (+)-**2**

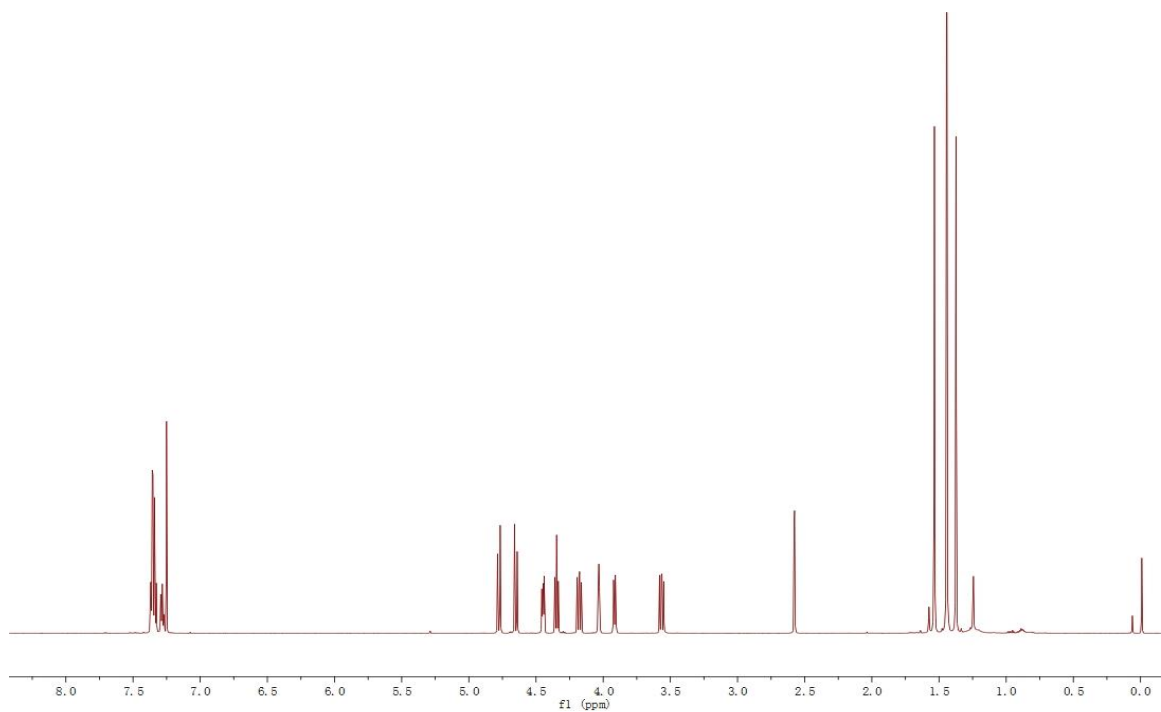

**Figure S12:** <sup>1</sup>H NMR spectrum (600 MHz, CDCl<sub>3</sub>) of (+)-**1**



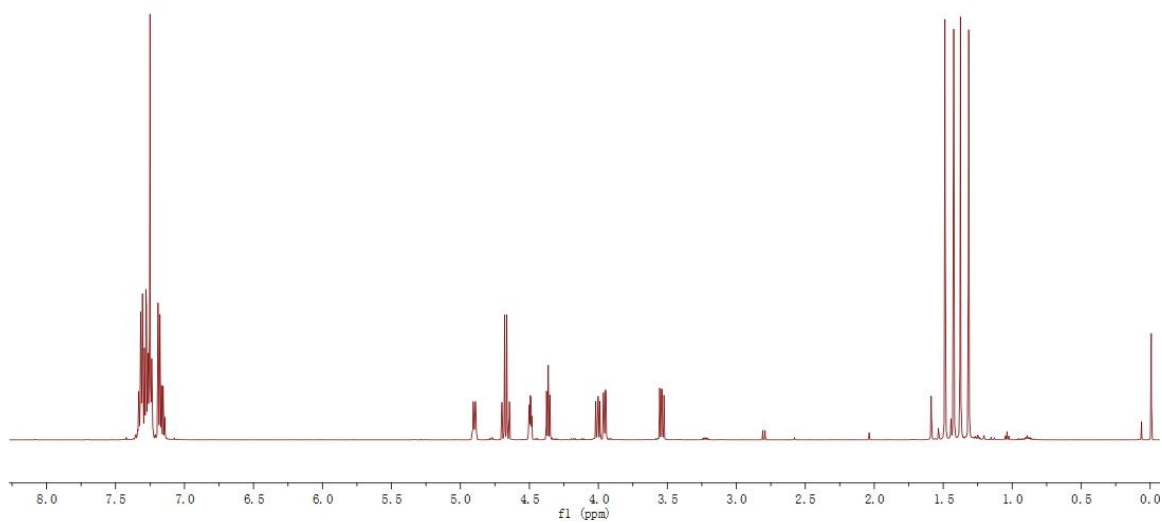

**Figure S13:** <sup>1</sup>H NMR spectrum (600 MHz, CDCl<sub>3</sub>) of (+)-**3**

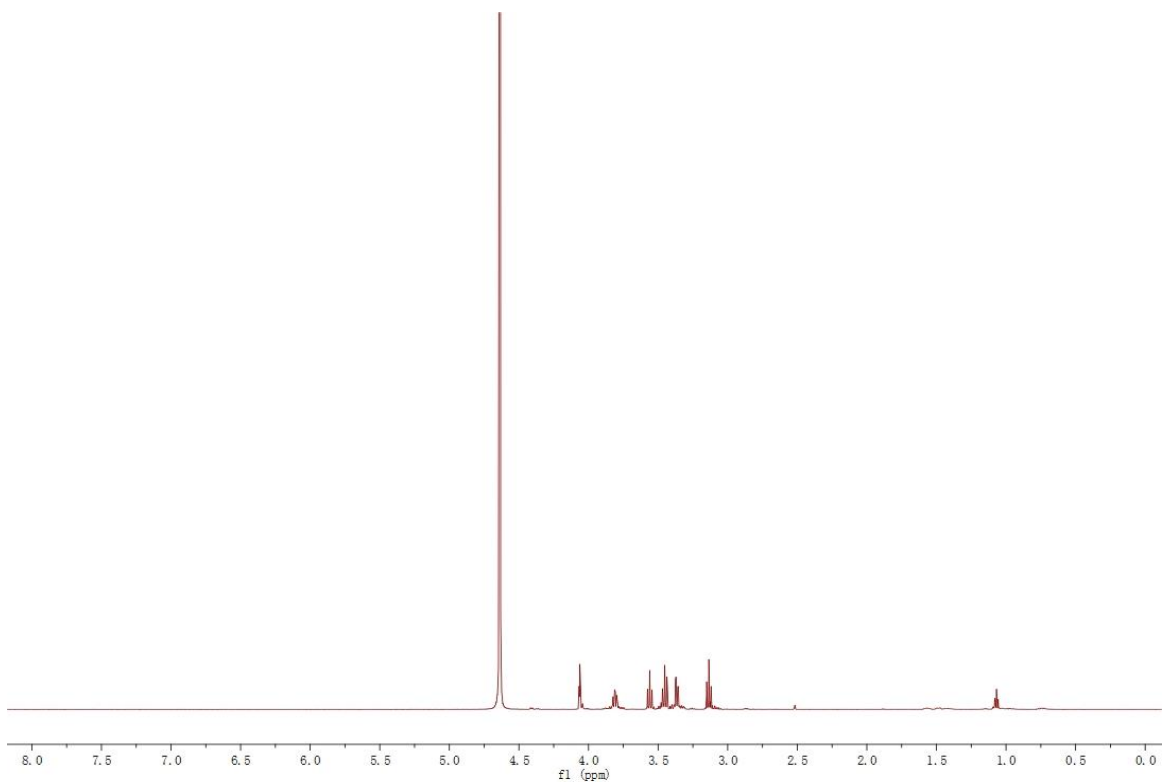

**Figure S14:** <sup>1</sup>H NMR spectrum (600 MHz, CDCl<sub>3</sub>) of 1L-Ins-1-P
